# Supplementary material
Source: Springer Nature journal article supplement (https://www.springermedizin.de/resource/supplementary/12885_2012_3724_MOESM1_ESM.pdf/9465916)

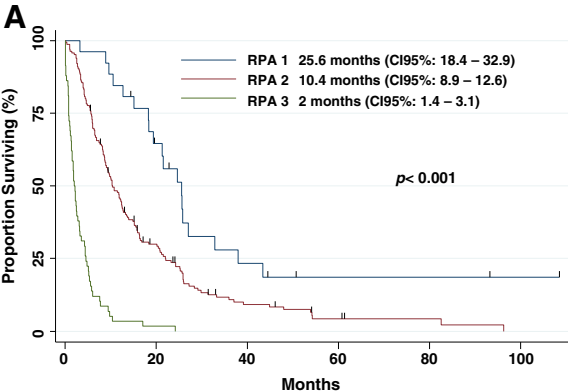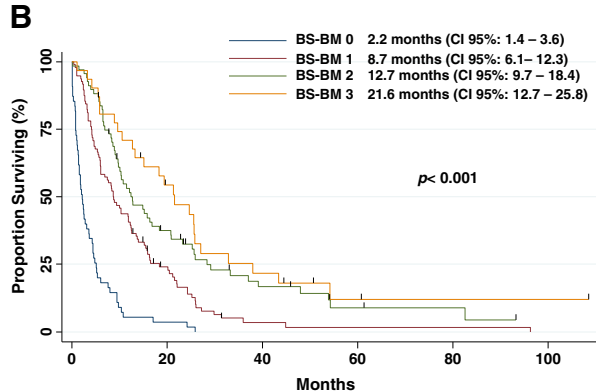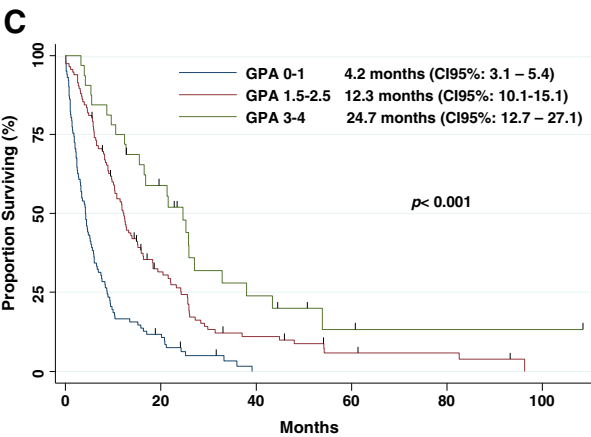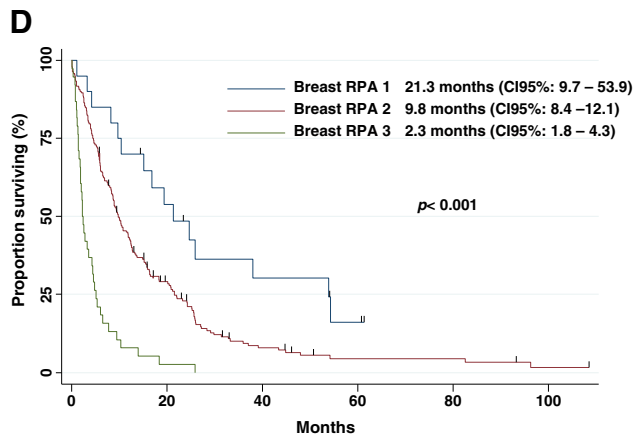

Supplement: MOESM1 [file 9465916]
